# Supplementary material for: Giant iron polyoxometalate that works as a catalyst for water oxidation
Source: Royal Society of Chemistry journal article supplement (doi:10.1039/c9nj05690d), 2020-01-01
Supplement: c9nj05690d1.pdf [file c9nj05690d1.pdf]

**Electronic supplementary information**

**The Giant Iron polyoxometalate that works as a catalyst for Water  
Oxidation**

Rahul Kaushik, Rahul Sakla, D. Amilan Jose\* and Amrita Ghosh\*

<sup>a</sup>National Institute of Technology (NIT) Kurukshetra, Kurukshetra-136119, Haryana, India.

Email: [amritaghosh2003@gmail.com](mailto:amritaghosh2003@gmail.com); [amilanjoseNIT@nitkkr.ac.in](mailto:amilanjoseNIT@nitkkr.ac.in)

## 1. Experimental section

### 1.1. Materials and Instrument:

All chemicals were of analytical grade and used without further purification.  $\text{FeCl}_3 \cdot 6\text{H}_2\text{O}$ ,  $\text{CH}_3\text{COONa} \cdot 3\text{H}_2\text{O}$  and all the other chemicals were purchased from Sigma Aldrich.

### 1.2 Synthesis of catalyst $((\text{NH}_4)_{42}[\text{Mo}^{\text{VI}}_{72}\text{Mo}^{\text{V}}_{60}\text{O}_{372}(\text{CH}_3\text{COO})_{30}(\text{H}_2\text{O})_{72}] \sim 300 \text{ H}_2\text{O}$ :

To a stirred solution of  $(\text{NH}_4)_6\text{Mo}_7\text{O}_{24} \cdot 4\text{H}_2\text{O}$  (5.6 g, 4.5 mmol) and  $\text{CH}_3\text{COONH}_4$  (12.5 g, 162.2 mmol) in 250 mL water  $\text{N}_2\text{H}_6 \cdot \text{SO}_4$  (0.8 g, 6.1 mmol) was added and further stirred for 10 minutes. The color change of the solution was observed bluish green. Then 50% (v/v)  $\text{CH}_3\text{COOH}$  (83 mL) was mixed to it. The green solution was stored in an open 500-mL Erlenmeyer flask at  $20^\circ\text{C}$  undisturbed. The color of the solution slowly changed to dark brown. After 4/5 days the reddish-brown crystals were filtered off and finally dried in air. Yield: 3.0 g.

### 1.3 Synthesis of catalyst I:

The  $\text{FeCl}_3 \cdot 6\text{H}_2\text{O}$  (1.1 g, 4.1 mmol) was dissolved and stirred in 75 mL water and then  $\text{CH}_3\text{COONa} \cdot 3\text{H}_2\text{O}$  (1.1 g, 8.1 mmol) was added to it. Next, the previously synthesized  $((\text{NH}_4)_{42}[\text{Mo}^{\text{VI}}_{72}\text{Mo}^{\text{V}}_{60}\text{O}_{372}(\text{CH}_3\text{COO})_{30}(\text{H}_2\text{O})_{72}] \sim 300 \text{ H}_2\text{O}$  (1.4 g, 0.05 mmol) was added in the solution. The mixture was vigorously stirred open in a 100-mL Erlenmeyer flask for 24 h. Then  $\text{HCl}$  (1M, 1 mL) was added to it followed by the addition of  $\text{NaCl}$  (2.0 g). The reaction mixture was heated to  $90^\circ\text{C}$  -  $95^\circ\text{C}$  and stirred continuously then filtered hot. The golden yellow colour filtrate was cooled to room temperature, and after 2/3 days yellow crystals formed. The crystals along with golden yellow precipitate were collected by filtration and washed carefully with a little iced water followed by drying in air. Yield: 560 mg.

## 2. pH dependence:

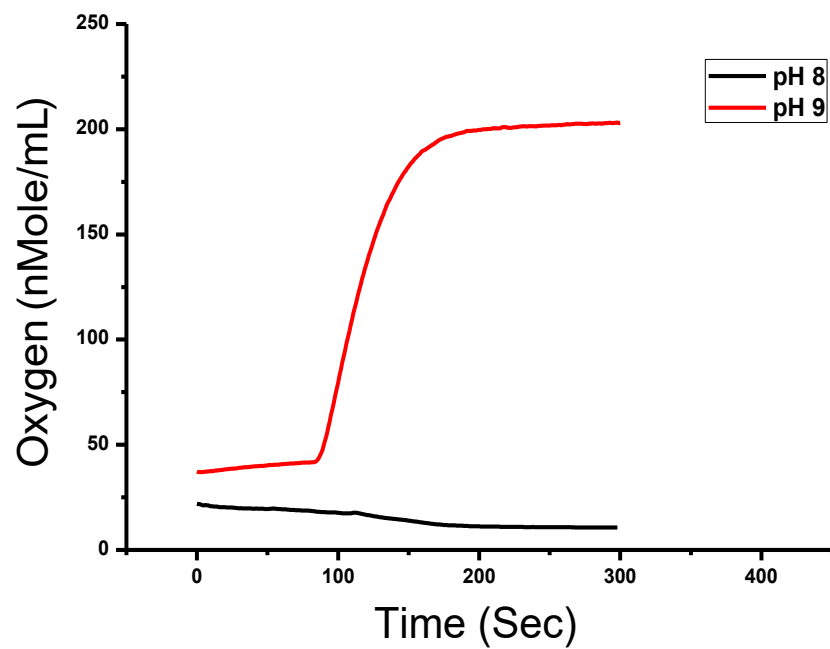

**Figure S1:** Oxygen evolution of catalyst **I** in pH 8 (black) and pH 9 (red) with catalyst (2 mg, in 2 mL).  $\text{Ru}(\text{bpy})_3^{2+}$  (1 mM) and  $\text{Na}_2\text{S}_2\text{O}_8$  (10 mM); Sodium borate buffer (10 mM, pH 9).

**3. Table S1: Iron complexes/iron POMs catalysts reported for water oxidation process:**

| Iron complexes or iron POMs catalysts                                                              | Reaction condition applied                                                                                                                               | Instrument/method used to monitor the oxygen evolution | Turn over number/turnover frequency | Reference                                                                                                                                           |
|----------------------------------------------------------------------------------------------------|----------------------------------------------------------------------------------------------------------------------------------------------------------|--------------------------------------------------------|-------------------------------------|-----------------------------------------------------------------------------------------------------------------------------------------------------|
| cis-Fe(mcp)Cl <sub>2</sub><br>(mcp=N,N'-dimethyl-N,N'-bis(2-pyridylmethyl)cyclohexane-1,2-diamine) | [Ru(bpy) <sub>3</sub> (ClO <sub>4</sub> ) <sub>3</sub> ]=0.75 mm, in 15 mm borate buffer (pH 8.5) at 23°C. Time=120 s.                                   | Clark electrode                                        | ---                                 | Chen, G.; Chen, L.; Ng, S.-M.; Man, W.-L.; Lau, T.-C. <i>Angewandte Chemie International Edition</i> <b>2013</b> , <i>52</i> , 1789-1791. (Ref: 38) |
| cis-Fe(mcp)Cl <sub>2</sub><br>(mcp=N,N'-dimethyl-N,N'-bis(2-pyridylmethyl)cyclohexane-1,2-diamine) | [Ru(bpy) <sub>3</sub> Cl <sub>2</sub> ]=0.2 mm, [Na <sub>2</sub> S <sub>2</sub> O <sub>8</sub> ]=2 mm in 15 mm borate buffer (pH 8.5) at 23°C, λ>420 nm. | GC                                                     | 194/--                              | Chen, G.; Chen, L.; Ng, S.-M.; Man, W.-L.; Lau, T.-C. <i>Angewandte Chemie International Edition</i> <b>2013</b> , <i>52</i> , 1789-1791. (Ref: 38) |
| [Fe(bpy) <sub>2</sub> Cl <sub>2</sub> ]Cl (bpy=bipyridine)                                         | [Ru(bpy) <sub>3</sub> (ClO <sub>4</sub> ) <sub>3</sub> ]=0.75 mm, in 15 mm borate buffer (pH 8.5) at 23°C. Time=120 s.                                   | Clark electrode                                        | 95/3.6 s <sup>-1</sup>              | Chen, G.; Chen, L.; Ng, S.-M.; Man, W.-L.; Lau, T.-C. <i>Angewandte Chemie International Edition</i> <b>2013</b> , <i>52</i> , 1789-1791. (Ref: 38) |
| [Fe(bpy) <sub>2</sub> Cl <sub>2</sub> ]Cl (bpy=bipyridine)                                         | [Ru(bpy) <sub>3</sub> Cl <sub>2</sub> ]=0.2 mm, [Na <sub>2</sub> S <sub>2</sub> O <sub>8</sub> ]=2 mm in 15 mm borate buffer (pH 8.5) at 23°C, λ>420 nm. | GC                                                     | 157/---                             | Chen, G.; Chen, L.; Ng, S.-M.; Man, W.-L.; Lau, T.-C. <i>Angewandte Chemie International Edition</i> <b>2013</b> , <i>52</i> , 1789-1791. (Ref: 38) |
| [Fe(tpy) <sub>2</sub> ]Cl <sub>2</sub> (tpy=2,2':6',2'' terpyridine)                               | [Ru(bpy) <sub>3</sub> (ClO <sub>4</sub> ) <sub>3</sub> ]=0.75 mm, in 15 mm borate buffer (pH 8.5) at 23°C. Time=120 s.                                   | Clark electrode                                        | 19/1.5 s <sup>-1</sup>              | Chen, G.; Chen, L.; Ng, S.-M.; Man, W.-L.; Lau, T.-C. <i>Angewandte Chemie International Edition</i> <b>2013</b> , <i>52</i> , 1789-1791. (Ref: 38) |
| [Fe(tpy) <sub>2</sub> ]Cl <sub>2</sub> (tpy=2,2':6',2'' terpyridine)                               | [Ru(bpy) <sub>3</sub> Cl <sub>2</sub> ]=0.2 mm, [Na <sub>2</sub> S <sub>2</sub> O <sub>8</sub> ]=2 mm in 15 mm borate buffer (pH 8.5) at 23°C, λ>420 nm. | GC                                                     | 376/---                             | Chen, G.; Chen, L.; Ng, S.-M.; Man, W.-L.; Lau, T.-C. <i>Angewandte Chemie International Edition</i> <b>2013</b> , <i>52</i> , 1789-1791. (Ref: 38) |
| cis-[Fe(cyclen)Cl <sub>2</sub> ]Cl<br>(cyclen=1,4,7,10-tetraazacyclodecane)                        | [Ru(bpy) <sub>3</sub> (ClO <sub>4</sub> ) <sub>3</sub> ]=0.75 mm, in 15 mm borate buffer (pH 8.5) at 23°C. Time=120 s.                                   | Clark electrode                                        | 108/4.4 s <sup>-1</sup>             | Chen, G.; Chen, L.; Ng, S.-M.; Man, W.-L.; Lau, T.-C. <i>Angewandte Chemie International Edition</i> <b>2013</b> , <i>52</i> , 1789-1791. (Ref: 38) |

|                                                                                                                                               |                                                                                                                                                                       |                                                       |                               |                                                                                                                                                     |
|-----------------------------------------------------------------------------------------------------------------------------------------------|-----------------------------------------------------------------------------------------------------------------------------------------------------------------------|-------------------------------------------------------|-------------------------------|-----------------------------------------------------------------------------------------------------------------------------------------------------|
| cis-[Fe(cyclen)Cl <sub>2</sub> ]Cl<br>(cyclen=1,4,7,10-tetraazacyclodecane)                                                                   | [Ru(bpy) <sub>3</sub> Cl <sub>2</sub> ]=0.2 mm,<br>[Na <sub>2</sub> S <sub>2</sub> O <sub>8</sub> ]=2 mm in<br>15 mm borate buffer (pH 8.5)<br>at 23°C, λ>420 nm.     | GC                                                    | 412/---                       | Chen, G.; Chen, L.; Ng, S.-M.; Man, W.-L.; Lau, T.-C. <i>Angewandte Chemie International Edition</i> <b>2013</b> , <i>52</i> , 1789-1791. (Ref: 38) |
| trans-Fe(tmc)Br <sub>2</sub> (tmc=1,4,8,11-tetramethyl-1,4,8,11-tetraazacyclotetradecane)                                                     | [Ru(bpy) <sub>3</sub> (ClO <sub>4</sub> ) <sub>3</sub> ]=0.75 mm,<br>in 15 mm borate<br>buffer (pH 8.5) at 23°C.<br>Time=120 s.                                       | Clark<br>electrode                                    | 93/4.6                        | Chen, G.; Chen, L.; Ng, S.-M.; Man, W.-L.; Lau, T.-C. <i>Angewandte Chemie International Edition</i> <b>2013</b> , <i>52</i> , 1789-1791. (Ref: 38) |
| trans-Fe(tmc)Br <sub>2</sub> (tmc=1,4,8,11-tetramethyl-1,4,8,11-tetraazacyclotetradecane)                                                     | [Ru(bpy) <sub>3</sub> Cl <sub>2</sub> ]=0.2 mm,<br>[Na <sub>2</sub> S <sub>2</sub> O <sub>8</sub> ]=2 mm in<br>15 mm borate buffer (pH 8.5)<br>at 23°C, λ>420 nm.     | GC                                                    | 364/---                       | Chen, G.; Chen, L.; Ng, S.-M.; Man, W.-L.; Lau, T.-C. <i>Angewandte Chemie International Edition</i> <b>2013</b> , <i>52</i> , 1789-1791. (Ref: 38) |
| Fe(ClO <sub>4</sub> ) <sub>3</sub>                                                                                                            | [Ru(bpy) <sub>3</sub> (ClO <sub>4</sub> ) <sub>3</sub> ]=0.75 mm,<br>in 15 mm borate<br>buffer (pH 8.5) at 23°C.<br>Time=120 s.                                       | Clark<br>electrode                                    | 147/9.6 s <sup>-1</sup>       | Chen, G.; Chen, L.; Ng, S.-M.; Man, W.-L.; Lau, T.-C. <i>Angewandte Chemie International Edition</i> <b>2013</b> , <i>52</i> , 1789-1791. (Ref: 38) |
| Fe(ClO <sub>4</sub> ) <sub>3</sub>                                                                                                            | [Ru(bpy) <sub>3</sub> Cl <sub>2</sub> ]=0.2 mm,<br>[Na <sub>2</sub> S <sub>2</sub> O <sub>8</sub> ]=2 mm in<br>15 mm borate buffer (pH 8.5)<br>at 23°C, λ>420 nm.     | GC                                                    | 436/---                       | Chen, G.; Chen, L.; Ng, S.-M.; Man, W.-L.; Lau, T.-C. <i>Angewandte Chemie International Edition</i> <b>2013</b> , <i>52</i> , 1789-1791. (Ref: 38) |
| {PMo <sub>12</sub> O <sub>40</sub> @Mo <sub>72</sub> Fe <sub>30</sub> } <i>n</i><br>( <i>Heterogeneous catalyst</i> )                         | The reaction mixture was kept<br>in a photo reactor under uv-<br>light (300 Watt, λ <sub>max</sub> = 280–<br>400 nm,<br>photon flux-77mW/cm <sup>2</sup> for 14<br>h. | YSI dissolved<br>oxygen meter/ cyclic-<br>voltammetry | 20256/24.11 min <sup>-1</sup> | Das, S.; Roy, S. <i>Photochemical Journal of Molecular and Engineering Materials</i> <b>2017</b> , <i>05</i> , 1750001. (Ref: 32)                   |
| [Fe <sup>III</sup> (L1)Cl <sub>2</sub> ] <sup>+</sup> (L1=N,N'-dimethyl-2,11-diaza[3,3](2,6)pyridinophane)<br>( <i>Homogeneous catalyst</i> ) | [NH <sub>4</sub> ] <sub>2</sub> [Ce <sup>IV</sup> (NO <sub>3</sub> ) <sub>6</sub> ] (CAN),<br>as<br>the oxidant; with 0.1 M HNO <sub>3</sub>                          | GC                                                    | 93/---                        | To, W.-P.; Wai-Shan Chow, T.; Tse, C.-W.; Guan, X.; Huang, J.-S.; Che, C.-M. <i>Chemical Science</i> <b>2015</b> , <i>6</i> , 5891-5903. (Ref: 28)  |
|                                                                                                                                               | NaIO <sub>4</sub> as<br>the oxidant; with 0.1 M HNO <sub>3</sub>                                                                                                      |                                                       | 44/---                        |                                                                                                                                                     |
|                                                                                                                                               | Oxone as<br>the oxidant.; with 0.1 M<br>HNO <sub>3</sub>                                                                                                              |                                                       | 113/---                       |                                                                                                                                                     |

|                                                                                                                                                                                                                            |                                                                                                                                                         |                             |                        |                                                                                                                                 |
|----------------------------------------------------------------------------------------------------------------------------------------------------------------------------------------------------------------------------|---------------------------------------------------------------------------------------------------------------------------------------------------------|-----------------------------|------------------------|---------------------------------------------------------------------------------------------------------------------------------|
| [Fe(TAML)(OH <sub>2</sub> )] (TAML = tetraamido macrocyclic ligand) ( <i>Homogeneous catalyst</i> )                                                                                                                        | [NH <sub>4</sub> ] <sub>2</sub> [Ce <sup>IV</sup> (NO <sub>3</sub> ) <sub>6</sub> ] (CAN), as the oxidant; pH 1.0                                       | GC                          | 18/1.3 s <sup>-1</sup> | W. C. Ellis, N. D. McDaniel, S. Bernhard and T. J. Collins, <i>J. Am. Chem. Soc.</i> , <b>2010</b> , <i>132</i> , 10990-10991.  |
| [Fe(OTf) <sub>2</sub> (Me <sub>2</sub> Pytacn)], (OTf = CF <sub>3</sub> SO <sub>3</sub> <sup>-</sup> ; Me <sub>2</sub> Pytacn = 1-(2-pyridylmethyl)-4,7-dimethyl-1,4,7-triazacyclononane)) ( <i>Homogeneous catalyst</i> ) | [NH <sub>4</sub> ] <sub>2</sub> [Ce <sup>IV</sup> (NO <sub>3</sub> ) <sub>6</sub> ] (CAN)                                                               | GC                          | 82/---                 | J. L. Fillol, Z. Codola, I. Garcia-Bosch, L. Go´mez, J. J. Pla and M. Costas, <i>Nat. Chem.</i> , <b>2011</b> , <i>3</i> , 807. |
| [Fe(OTf) <sub>2</sub> (mcp)] ( <i>Homogeneous catalyst</i> )                                                                                                                                                               | [NH <sub>4</sub> ] <sub>2</sub> [Ce <sup>IV</sup> (NO <sub>3</sub> ) <sub>6</sub> ] (CAN)                                                               | GC                          | 360/---                | J. L. Fillol, Z. Codola, I. Garcia-Bosch, L. Go´mez, J. J. Pla and M. Costas, <i>Nat. Chem.</i> , <b>2011</b> , <i>3</i> , 807. |
|                                                                                                                                                                                                                            | NaIO <sub>4</sub>                                                                                                                                       |                             | 1050/---               |                                                                                                                                 |
| [(Fe(mcp)) <sub>2</sub> (μ-O)(μ-OH)](OTf) <sub>2</sub> ( <i>Homogeneous catalyst</i> )                                                                                                                                     | [NH <sub>4</sub> ] <sub>2</sub> [Ce <sup>IV</sup> (NO <sub>3</sub> ) <sub>6</sub> ] (CAN)                                                               | GC                          | 210/---                | J. L. Fillol, Z. Codola, I. Garcia-Bosch, L. Go´mez, J. J. Pla and M. Costas, <i>Nat. Chem.</i> , <b>2011</b> , <i>3</i> , 807. |
| [Fe(OTf) <sub>2</sub> (bpbp)], (bpbp= N,N'-bis(2-pyridylmethyl)-2,2'-bipyrrrolidine) ( <i>Homogeneous catalyst</i> )                                                                                                       | NH <sub>4</sub> ] <sub>2</sub> [Ce <sup>IV</sup> (NO <sub>3</sub> ) <sub>6</sub> ] (CAN)                                                                | GC                          | 63/---                 | J. L. Fillol, Z. Codola, I. Garcia-Bosch, L. Go´mez, J. J. Pla and M. Costas, <i>Nat. Chem.</i> , <b>2011</b> , <i>3</i> , 807. |
| [Fe(OTf) <sub>2</sub> (mep)], (mep= N,N'-dimethyl-N,N'-bis-(2-pyridylmethyl)-ethane-1,2-diamine) ( <i>Homogeneous catalyst</i> )                                                                                           | NH <sub>4</sub> ] <sub>2</sub> [Ce <sup>IV</sup> (NO <sub>3</sub> ) <sub>6</sub> ] (CAN)                                                                | GC                          | 145/---                | J. L. Fillol, Z. Codola, I. Garcia-Bosch, L. Go´mez, J. J. Pla and M. Costas, <i>Nat. Chem.</i> , <b>2011</b> , <i>3</i> , 807. |
| [Fe(OTf) <sub>2</sub> (tpa)] (tpa=tris-(2-pyridylmethyl)amine) ( <i>Homogeneous catalyst</i> )                                                                                                                             | NH <sub>4</sub> ] <sub>2</sub> [Ce <sup>IV</sup> (NO <sub>3</sub> ) <sub>6</sub> ] (CAN)                                                                | GC                          | 40/---                 | J. L. Fillol, Z. Codola, I. Garcia-Bosch, L. Go´mez, J. J. Pla and M. Costas, <i>Nat. Chem.</i> , <b>2011</b> , <i>3</i> , 807. |
| Fe(Me <sub>3</sub> tacn)Cl <sub>3</sub> (Me <sub>3</sub> tacn=1,4,7-trimethyltriazacyclononane)                                                                                                                            | NH <sub>4</sub> ] <sub>2</sub> [Ce <sup>IV</sup> (NO <sub>3</sub> ) <sub>6</sub> ] (CAN) in aqueous CF <sub>3</sub> SO <sub>3</sub> H solution (pH = 1) | Clark-type oxygen electrode | 1.6/---                | B. Zhang, F. Li, F. Yu, H. Cui, X. Zhou, H. Li, Y. Wang and L. Sun, <i>Chem. Asian J.</i> , <b>2014</b> , <i>9</i> , 1515-1518. |
| [Fe(L-N <sub>4</sub> Me <sub>2</sub> )(CH <sub>3</sub> CN) <sub>2</sub> ](OTf) <sub>2</sub> (LN <sub>4</sub> Me <sub>2</sub> =N,N'-dimethyl-2,11-diaza[3.3](2,6)pyridinophane),                                            |                                                                                                                                                         |                             | 65/---                 |                                                                                                                                 |
| Fe <sup>III</sup> (dpaq)(H <sub>2</sub> O)](ClO <sub>4</sub> ) <sub>2</sub> (dpaq= 2-[bis(pyridine-2-                                                                                                                      | electrocatalyst; in propylene carbonate with H <sub>2</sub> O as a limiting chemical agent                                                              | Electrocatalysis            |                        | M. K. Coggins, M.-T. Zhang, A. K. Vannucci, C. J. Dares and T. J. Meyer,                                                        |

|                                                                                                                                                                                                                         |                                                                                                                                                   |                  |                         |                                                                                                                                         |
|-------------------------------------------------------------------------------------------------------------------------------------------------------------------------------------------------------------------------|---------------------------------------------------------------------------------------------------------------------------------------------------|------------------|-------------------------|-----------------------------------------------------------------------------------------------------------------------------------------|
| ylmethyl]amino-N-quinolin-8-yl-acetamido,                                                                                                                                                                               |                                                                                                                                                   |                  |                         | J. Am. Chem.Soc., <b>2014</b> , <i>136</i> , 5531-5534.                                                                                 |
| Fe(BQEN)(OTf) <sub>2</sub> (BQEN= N,N'-dimethyl-N,N'-bis(8-quinolyl)-ethane-1,2-diamine                                                                                                                                 | NH <sub>4</sub> ] <sub>2</sub> [Ce <sup>IV</sup> (NO <sub>3</sub> ) <sub>6</sub> ] (CAN)                                                          | GC               | 80/---                  | D. Hong, S. Mandal, Y. Yamada, Y.-M. Lee, W. Nam, A. Llobet and S. Fukuzumi, <i>Inorg. Chem.</i> , <b>2013</b> , <i>52</i> , 9522-9531. |
| Fe(BQCN)(OTf) <sub>2</sub> ; (BQCN= N,N'-dimethyl-N,N'-bis(8-quinolyl)-cyclohexanediamine,                                                                                                                              |                                                                                                                                                   |                  | 20/---                  |                                                                                                                                         |
| [Fe(L <sub>1</sub> )] <sup>2+</sup> {L <sub>1</sub> = N,N-dimethyl-N,N'-bis(pyridazin-3-ylmethyl)ethane-1,2-diamine } ( <i>Homogeneous catalyst</i> )                                                                   | NH <sub>4</sub> ] <sub>2</sub> [Ce <sup>IV</sup> (NO <sub>3</sub> ) <sub>6</sub> ] (CAN); pH=0.7                                                  | Electrocatalysis | ---/141h <sup>-1</sup>  | W. A. Hoffert, M. T. Mock, A. M. Appel and J. Y. Yang, <i>Eur. J. Inorg. Chem.</i> , <b>2013</b> , <i>2013</i> , 3846-3857.             |
|                                                                                                                                                                                                                         | NaIO <sub>4</sub> ; pH=4.7                                                                                                                        |                  | ---/24h <sup>-1</sup>   |                                                                                                                                         |
| [Fe <sub>11</sub> (H <sub>2</sub> O) <sub>14</sub> (OH) <sub>2</sub> (W <sub>3</sub> O <sub>10</sub> ) <sub>2</sub> (α-SbW <sub>9</sub> O <sub>33</sub> ) <sub>6</sub> ] <sup>27-</sup> ( <i>Homogeneous catalyst</i> ) | [Ru(bpy) <sub>3</sub> Cl <sub>2</sub> ]=1.0 mm, [Na <sub>2</sub> S <sub>2</sub> O <sub>8</sub> ]=5 mm in 80 mm borate buffer (pH 10.0), λ>420 nm. | GC               | 1815/6.3s <sup>-1</sup> | <i>Chem. Commun.</i> , <b>2015</b> , <i>51</i> , 13925-13928                                                                            |

#### 4. The turnover numbers and turnover frequencies:

Table S2:

| S. No. | Catalyst I taken (mg) | Catalyst (nmoles) | Oxygen evolved (nmoles/ml) | Total Oxygen evolved for 2 ml | TON (moles of O <sub>2</sub> /moles of catalyst) | Time taken for complete saturation (min) | TOF (TON / time) min <sup>-1</sup> |
|--------|-----------------------|-------------------|----------------------------|-------------------------------|--------------------------------------------------|------------------------------------------|------------------------------------|
| 1.     | 0.24                  | 12.86             | 90                         | 180                           | 13.990                                           | 5                                        | 2.79                               |
| 2.     | 0.58                  | 31.10             | 125                        | 250                           | 8.038                                            | 5.5                                      | 1.46                               |
| 3.     | 0.8                   | 42.89             | 150                        | 300                           | 6.994                                            | 2.91                                     | 2.40                               |
| 4.     | 1.0                   | 53.62             | 164                        | 328                           | 6.117                                            | 1.8                                      | 3.39                               |
| 5.     | 1.2                   | 64.34             | 178                        | 356                           | 5.533                                            | 1.58                                     | 3.50                               |



## 5. SEM images before and after catalysis:

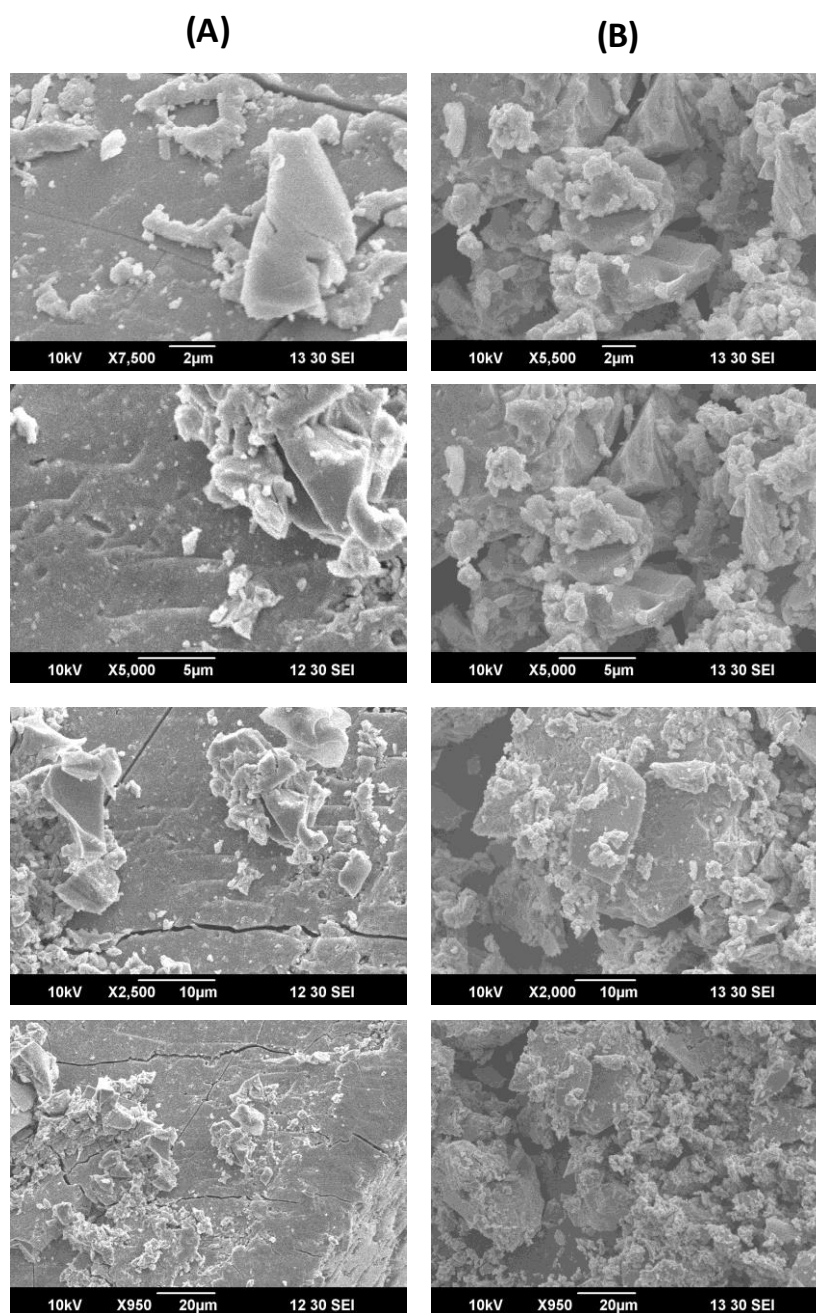

**Figure S2:** SEM images of the catalyst **I** at different resolution before catalysis (**A**) and after one catalytic cycle (**B**).
